# Supplementary material for: A fluorescein based dual optical sensor for highly selective and sensitive fluoride detection in 100% water medium
Source: Royal Society of Chemistry journal article supplement (doi:10.1039/d4ay02287d), 2025-01-01
Supplement: d4ay02287d1.pdf [file d4ay02287d1.pdf]

## Electronic Supplementary Information

### Fluorescein Based Dual Optical Sensor for Highly Selective and Sensitive Fluoride Detection in 100 % Water Medium

Bikash Chandra Mushahary,<sup>a,b</sup> Debajit Bora,<sup>a</sup> Chayanika Goswami,<sup>a</sup> Mayur Jyoti Bhuyan,<sup>a</sup> Sudhangshu Priya Bharati,<sup>a,c</sup> Rituraj Das<sup>d</sup> and Sanjeev Pran Mahanta<sup>\*a</sup>

<sup>a</sup>Department of Chemical Sciences, Tezpur University, Tezpur, Assam 784028, India.

<sup>b</sup>Department of Chemistry, Bodoland University, Kokrajhar, 783370, Assam, India.

<sup>c</sup>Department of Chemistry, Lumding College, Lumding, Assam, 782447, India.

<sup>d</sup>Department of Chemistry, Morigaon College, Morigaon, Assam 782105, India.

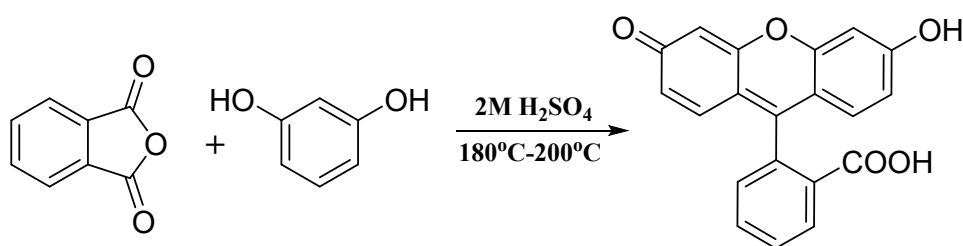

### General Synthesis procedure:

#### Scheme 1: Synthesis of Fluorescein (**M**).

Fluorescein (**M**) was prepared by reacting 0.3 g (2.2 mmol) of phthalic dianhydride with 0.5 g (4.5mmol) of Resorcinol in presence of 6-7 drops of 2M H<sub>2</sub>SO<sub>4</sub> in a round bottom flask. Later, the reaction mixture was heated at 180°C - 200°C for 30 min and cooled for 5 min after removing it from the reaction bath. After coming to room temperature, 10 mL of acetone was added to the reaction mixture and stirred for another 15-20 min until the solution turns yellow.

**M**: Reddish brown, Yield: 70%, FT-IR of **M** (cm<sup>-1</sup>): ν(O-H) = 3389.73, ν(C=O) = 1590. <sup>1</sup>H NMR (400 MHz, DMSO-*d*<sub>6</sub>) δ 10.21 (s, 1H), 7.98 (d, *J* = 7.9 Hz, 1H), 7.85 – 7.64 (m, 1H), 7.26 (d, *J* = 8.0 Hz, 1H), 6.81 – 6.47 (m, 4H). <sup>13</sup>C NMR (101 MHz, DMSO-*d*<sub>6</sub>) δ 207.05,

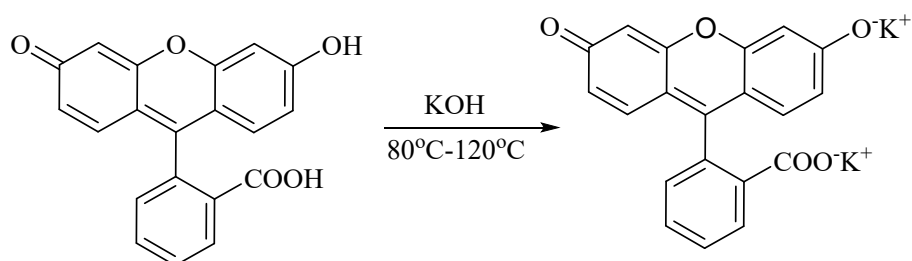

169.25, 160.06, 153.03, 152.38, 136.12, 130.59, 129.55, 126.71, 125.12, 124.58, 113.16, 110.09, 102.79. LCMS (M+H) =333.10 (Calculate: 332.10).

#### Scheme 2: Synthesis of Potassium salt of Fluorescein (**K<sub>2</sub>M**).

The Potassium salt of fluorescein was synthesized by treating with aqueous KOH (Scheme 2). 100 mg of fluorescein was mixed with 100 mg of KOH in 10 mL of water and refluxed overnight. The reaction was stopped and kept idle till precipitated as reddish orange coloured crystal.

**K<sub>2</sub>M**: Reddish orange, Yield: 70%, FT-IR of **M** (cm<sup>-1</sup>): ν(O-H) = 3442.52, ν(C=O) = 1630.90.

**General experimental procedure:****UV–Visible and Fluorescence Spectroscopy Studies:**

All the sensing experiment of fluorescein (**M**) and potassium salt of fluorescein (**K<sub>2</sub>M**) was performed in dimethyl sulphoxide and water solution respectively. The UV-Vis absorption experiments were performed with a 10 µM solution of the probe molecule (**M** in DMSO and **K<sub>2</sub>M** in H<sub>2</sub>O), while the corresponding fluorescence spectra were recorded with a 1 µM solution at an excitation wavelength of 520 nm at room temperature.

**Calculation of Binding Constant:**

The equilibrium constant for the complexation of M<sup>2-</sup> and Al<sup>3+</sup> is calculated from the UV-Visible titration data by considering absorbance at 475 nm with 1:1 and 1:2 binding model with the Bindfit tool accessed from the <http://supramolecular.org>.<sup>1</sup>

**Calculation of limit of detection (LOD):**

Limit of detection (LOD) was calculated using the formula

$$LOD = \frac{3S_E}{m},$$

where S<sub>E</sub> is the standard error of the intercept and *m* is the slope of the calibration plot in presence of fluoride ion.

**Determination of F<sup>-</sup> in Water Samples**

Different volumes of standard solution of F<sup>-</sup> (100 ppm) were added to prepare water samples containing different concentrations of F<sup>-</sup> required to obtain the calibration plot. The methodology was validated with different concentration of fluoride in ppm level prepared in tap water.

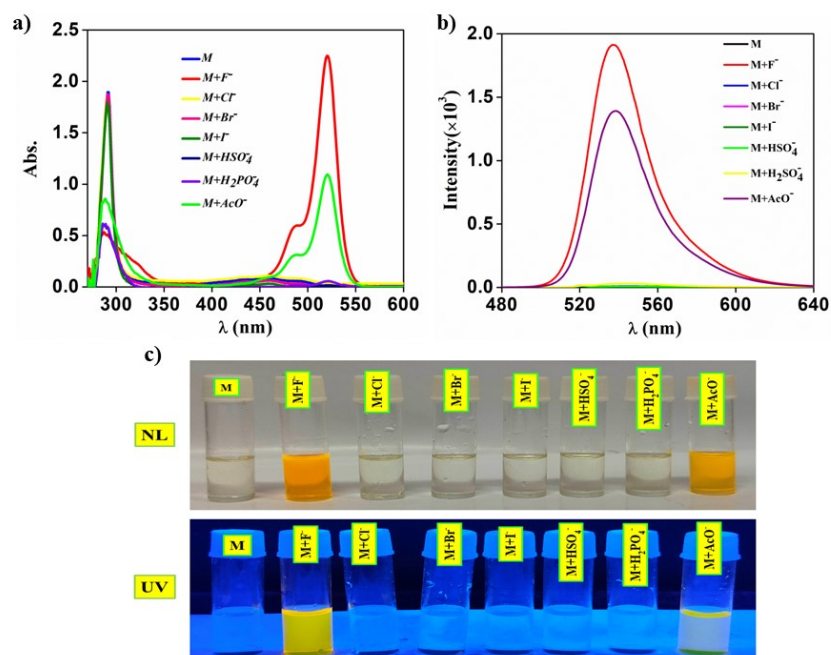

**Figure S1:** (a) UV-Vis spectra of **M** solution (10 μM) in DMSO in presence of different anions ( $1 \times 10^{-2}$  M) as their tetrabutylammonium salt; (b) Emission spectra of **M** solution (1 μM) in DMSO in presence of different anions ( $1 \times 10^{-3}$  M) as their tetrabutylammonium salt; (c) Colorimetric and fluorometric colour change of the probe molecules in presence of different

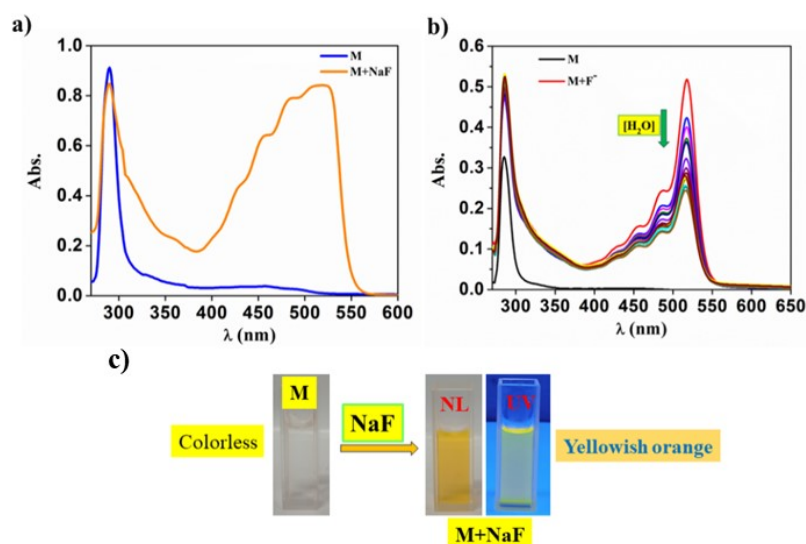

anions under normal light (NL) and UV lamp (365 nm wavelength).

**Figure S2:** UV-Vis spectrum of (a) **M** in DMSO upon addition of 50 μL of NaF ( $1 \times 10^{-2}$  M) aqueous solution; (b) Change in the UV-Vis spectrum of the (**M**+ NaF) solution in DMSO + H₂O mixture upon addition of H₂O; (c) Change in the colour of the solution of **M** in DMSO solution upon addition of NaF (aq).

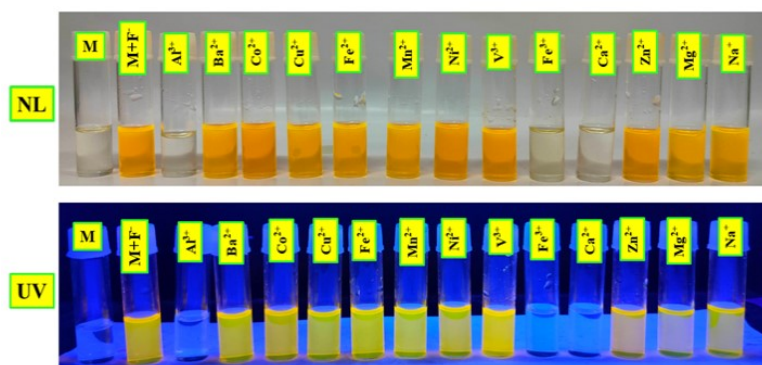

**Figure S3:** Images of colorimetric and fluorometric colour changes of **M** [10  $\mu\text{M}$ ] in DMSO solution upon addition of 10 mM aqueous solution of different metal salts (NaCl, MgSO<sub>4</sub>, VCl<sub>3</sub>, MnCl<sub>2</sub>, FeCl<sub>3</sub>, CoCl<sub>2</sub>, NiCl<sub>2</sub>.6H<sub>2</sub>O, CuCl<sub>2</sub>.2H<sub>2</sub>O, ZnCl<sub>2</sub>, CaCl<sub>2</sub>, BaSO<sub>4</sub>, FeCl<sub>2</sub>, AlCl<sub>3</sub>) in presence of F<sup>-</sup> ion ( $1 \times 10^{-2}$  M).

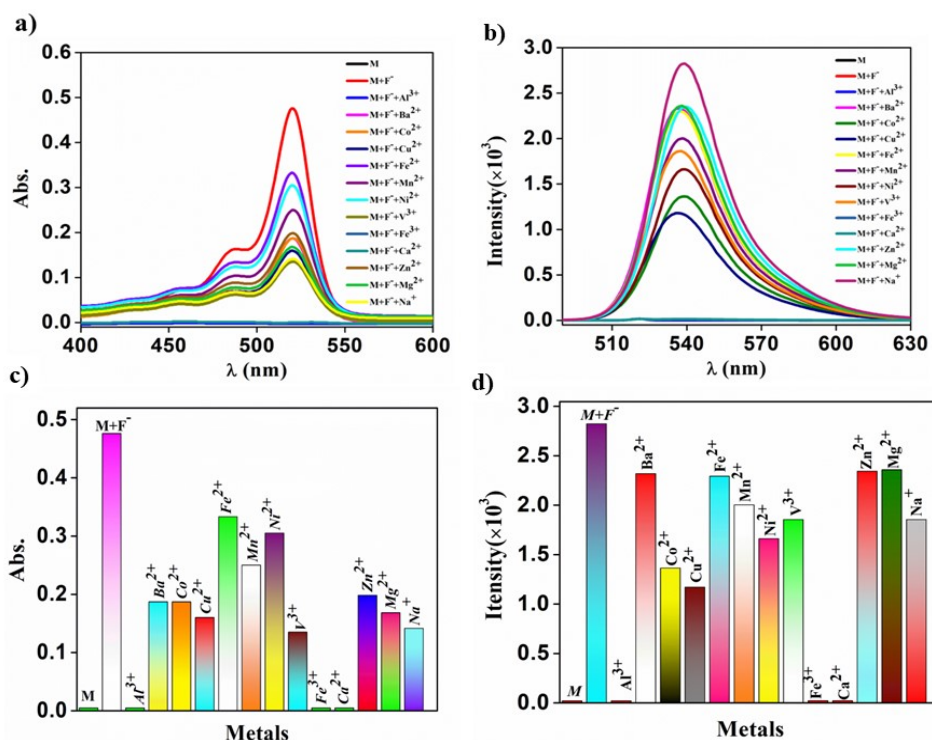

**Figure S4:** (a) UV-Vis spectra of **M** [10  $\mu\text{M}$ ] in DMSO solution upon addition of 10 mM aqueous solution of different metal salts (NaCl, MgSO<sub>4</sub>, VCl<sub>3</sub>, MnCl<sub>2</sub>, FeCl<sub>3</sub>, CoCl<sub>2</sub>, NiCl<sub>2</sub>.6H<sub>2</sub>O, CuCl<sub>2</sub>.2H<sub>2</sub>O, ZnCl<sub>2</sub>, CaCl<sub>2</sub>, BaSO<sub>4</sub>, FeCl<sub>2</sub>, AlCl<sub>3</sub>) in presence of F<sup>-</sup> ion ( $1 \times 10^{-2}$  M); (b) Emission spectra of **M** [2.5  $\mu\text{M}$ ] in DMSO solution upon addition of 1 mM aqueous solution of different metal salts (NaCl, MgSO<sub>4</sub>, VCl<sub>3</sub>, MnCl<sub>2</sub>, FeCl<sub>3</sub>, CoCl<sub>2</sub>, NiCl<sub>2</sub>.6H<sub>2</sub>O, CuCl<sub>2</sub>.2H<sub>2</sub>O, ZnCl<sub>2</sub>, CaCl<sub>2</sub>, BaSO<sub>4</sub>, FeCl<sub>2</sub>, AlCl<sub>3</sub>) in presence of F<sup>-</sup> ion ( $1 \times 10^{-2}$  M); (c) Bar representation of absorbance of the peak at 520 nm; (d) Bar representation of emission intensity of the peak at 540 nm.

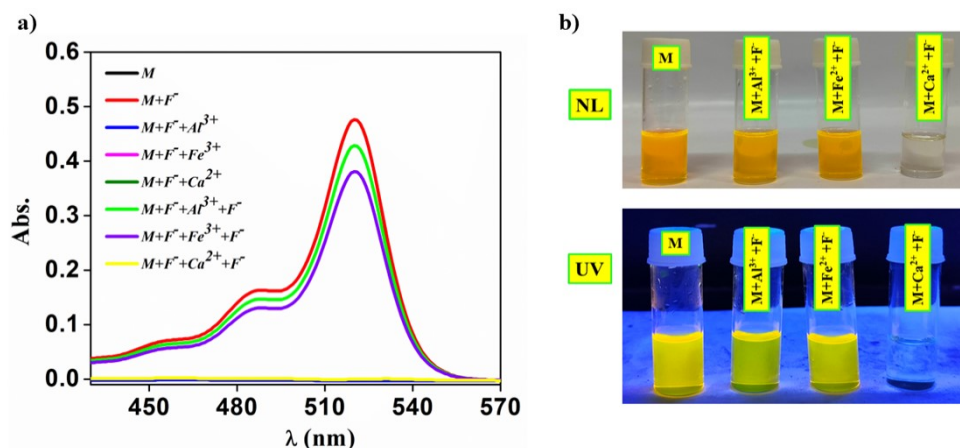

**Figure S5:** (a) UV-Vis spectra of **M**-metal complex [**M** (DMSO) +  $F^-$  (DMSO) +  $Al^{3+}$  (aq)] solution upon re-addition of aqueous NaF ( $1 \times 10^{-2}$  M) (**M**: Ca, Fe and Al); (b) Images of the corresponding colorimetric and fluorometric colour changes.

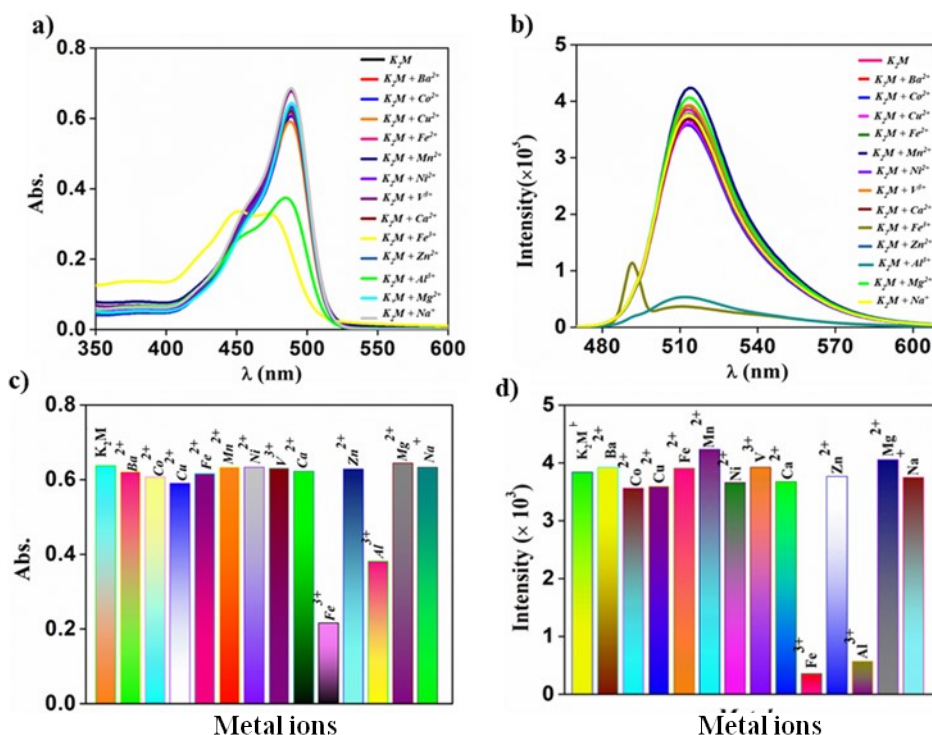

**Figure S6:** (a) UV-Vis spectra of  $K_2M$  [10  $\mu$ M] in water solution upon addition of 10 mM aqueous solution of different metal salts (NaCl,  $MgSO_4$ ,  $VCl_3$ ,  $MnCl_2$ ,  $FeCl_3$ ,  $CoCl_2$ ,  $NiCl_2 \cdot 6H_2O$ ,  $CuCl_2 \cdot 2H_2O$ ,  $ZnCl_2$ ,  $CaCl_2$ ,  $BaSO_4$ ,  $FeCl_2$ ,  $AlCl_3$ ) in presence of  $F^-$  ion; (b) Emission spectra of  $K_2M$  [2.5  $\mu$ M] in water solution upon addition of 1 mM aqueous solution of different metal salts (NaCl,  $MgSO_4$ ,  $VCl_3$ ,  $MnCl_2$ ,  $FeCl_3$ ,  $CoCl_2$ ,  $NiCl_2 \cdot 6H_2O$ ,  $CuCl_2 \cdot 2H_2O$ ,  $ZnCl_2$ ,  $CaCl_2$ ,  $BaSO_4$ ,  $FeCl_2$ ,  $AlCl_3$ ) in presence of  $F^-$  ion; (c,d) Bar representation of above two titrations.

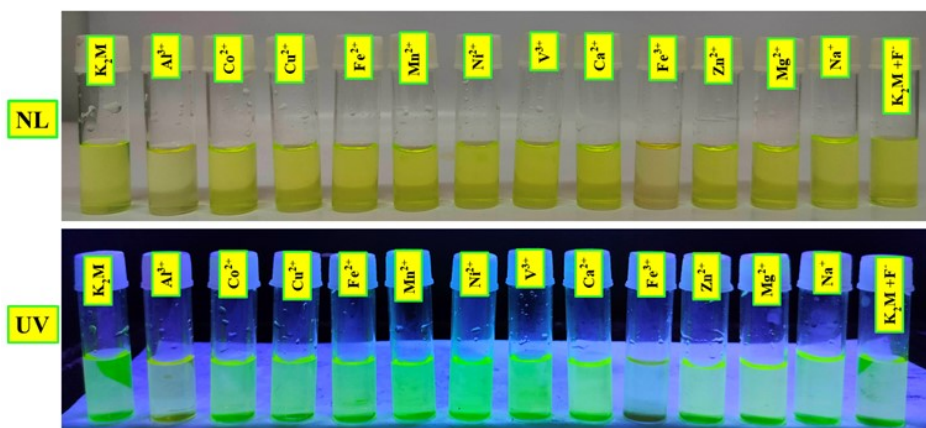

**Figure S7:** Images of the colorimetric and fluorometric colour change (NL: Normal light, UV: UV light) of  $K_2M$  [ $10 \mu M$ ] in water solution upon addition of 10 mM aqueous solution of different metal salts (NaCl,  $MgSO_4$ ,  $VCl_3$ ,  $MnCl_2$ ,  $FeCl_3$ ,  $CoCl_2$ ,  $NiCl_2 \cdot 6H_2O$ ,  $CuCl_2 \cdot 2H_2O$ ,  $ZnCl_2$ ,  $CaCl_2$ ,  $BaSO_4$ ,  $FeCl_2$ ,  $AlCl_3$ ) in presence of  $F^-$  ion.

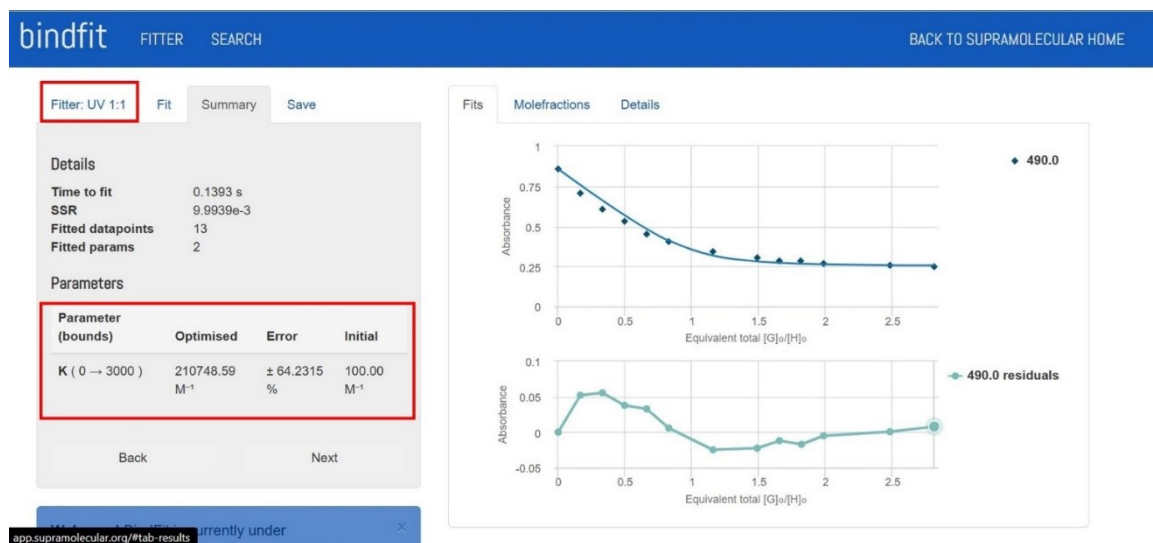

**Figure S8:** Screenshot of the summary window of <http://app.supramolecular.org/bindfit/>. This screenshot shows the data for the UV-Vis titration of  $K_2M$  with  $Al^{3+}$  ion for the absorption at 490 nm vs. the data fitted to the 1:1 UV binding model, the corresponding residual plot and the association constants with the calculated asymptotic standard errors.



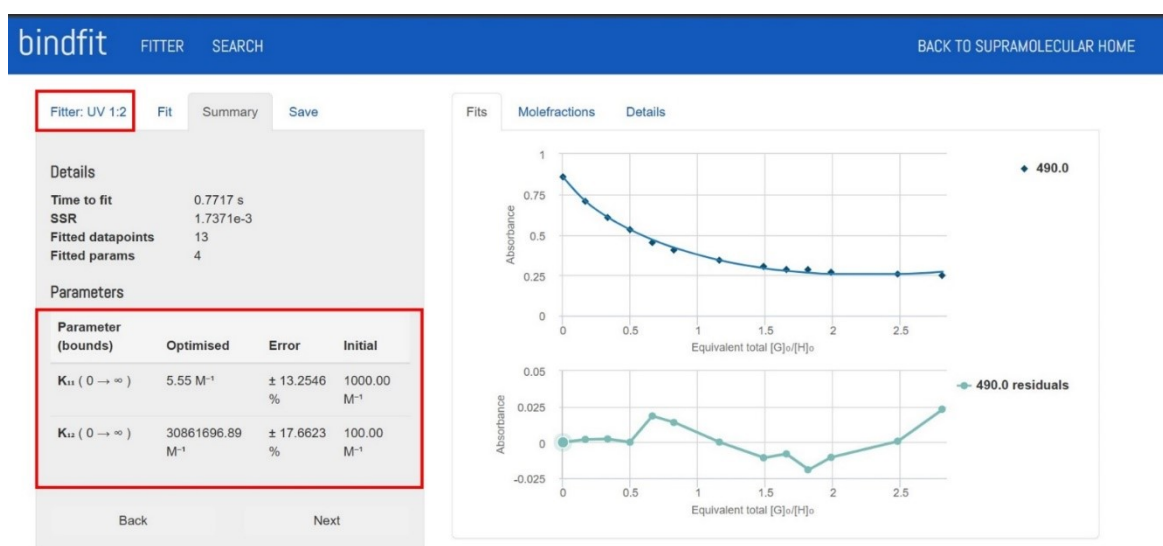

**Figure S9:** Screenshot of the summary window of <http://app.supramolecular.org/bindfit/>. This screenshot shows the data for the UV-Vis titration of **K<sub>2</sub>M** with Al<sup>3+</sup> ion for the absorption at 490 nm vs. the data fitted to the 1:2 UV binding model, the corresponding residual plot and the association constants with the calculated asymptotic standard errors.

**Table S1:** Summary of association constants between **K<sub>2</sub>M** and Al<sup>3+</sup> according to different binding models.

| Binding Models                  |                                           |
|---------------------------------|-------------------------------------------|
| 1:1                             | 1:2                                       |
| $2.1 \times 10^5 (\pm 64.23\%)$ | $K_{11} = 5.55 (\pm 13.25\%)$             |
|                                 | $K_{12} = 3.08 \times 10^7 (\pm 17.66\%)$ |



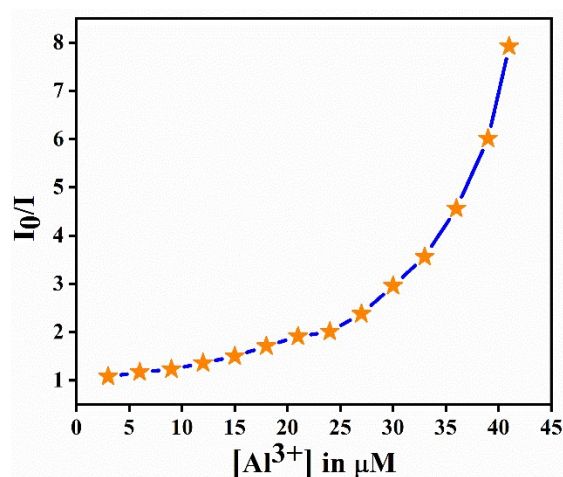

**Figure S10:** Change in the fluorescence intensity of the  $\text{K}_2\text{M}$  (aq) solution upon incremental addition of  $\text{Al}^{3+}$  (aq) solution.

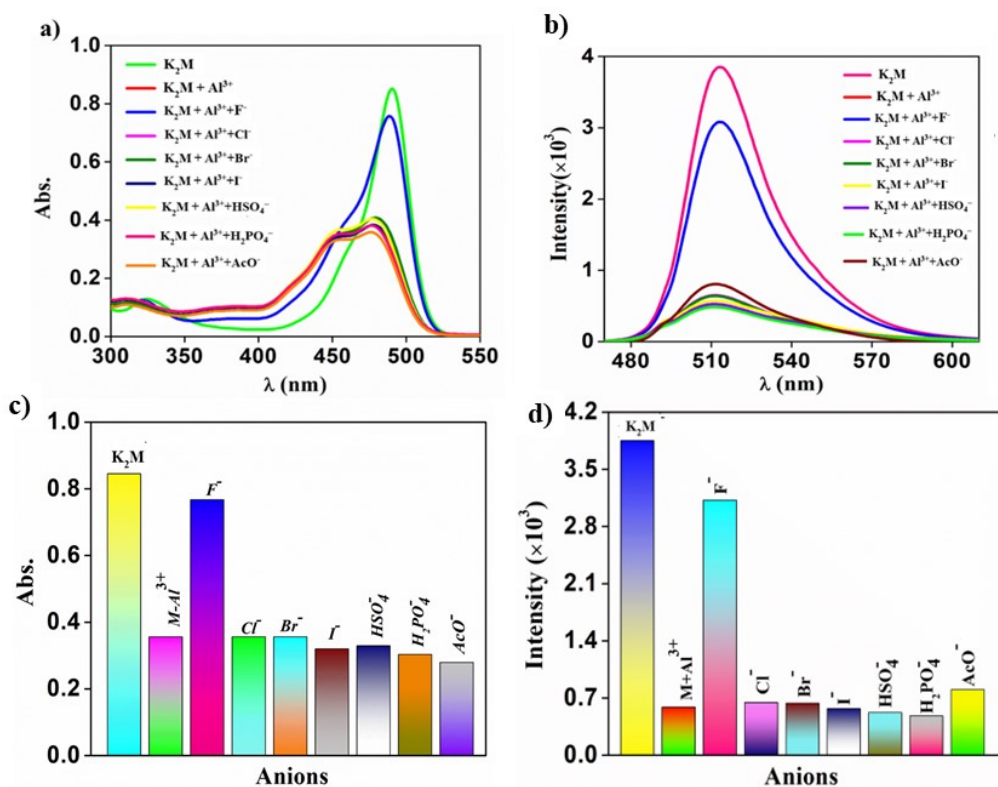

**Figure S11:** (a) UV-Vis spectra of probe  $\text{K}_2\text{M}$  (10  $\mu\text{M}$ ) in water upon addition of different anions ( $1 \times 10^{-2}$  M) in presence of  $\text{Al}^{3+}$  ( $1 \times 10^{-2}$  M); (b) Emission spectra of probe  $\text{K}_2\text{M}$  (2.5  $\mu\text{M}$ ) in water upon addition of different anions ( $1 \times 10^{-3}$  M) in presence of  $\text{Al}^{3+}$  ( $1 \times 10^{-3}$  M); (c) Bar representation of the change

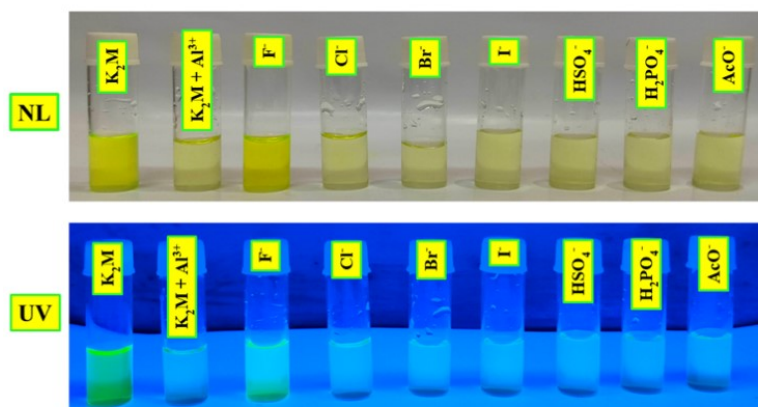

**Figure S12:** Images of colorimetric and fluorometric changes of  $K_2M$  (10  $\mu M$ ) in water solution upon addition of different anions ( $1 \times 10^{-2} M$ ) in presence of  $Al^{3+}$  ( $1 \times 10^{-2} M$ ).

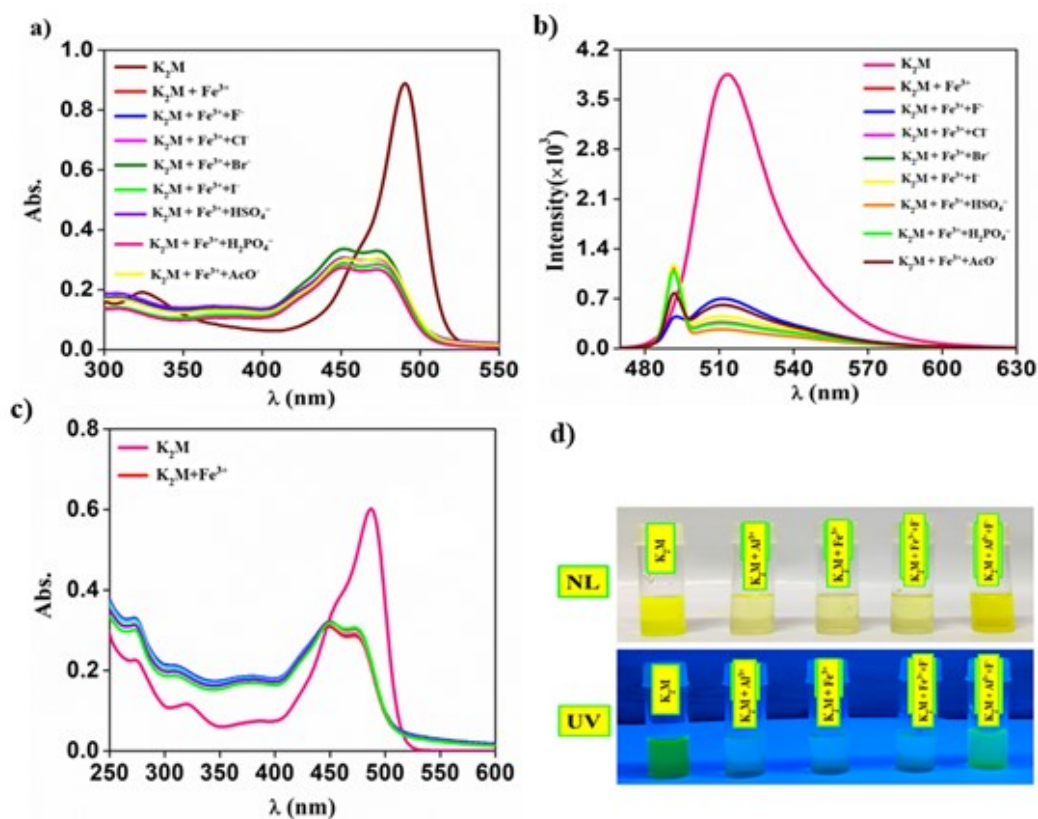

**Figure S13:** (a) UV-Vis absorption spectra of  $K_2M-Fe^{3+}$  solution upon addition of different anions in water medium; (b) Emission spectra of  $K_2M-Fe^{3+}$  upon addition of different anions in water medium; (c) UV-Vis absorption spectra of  $K_2M-Fe^{3+}$  solution upon gradual addition of  $F^-$  in water medium; (d) Images of colorimetric and fluorometric changes.

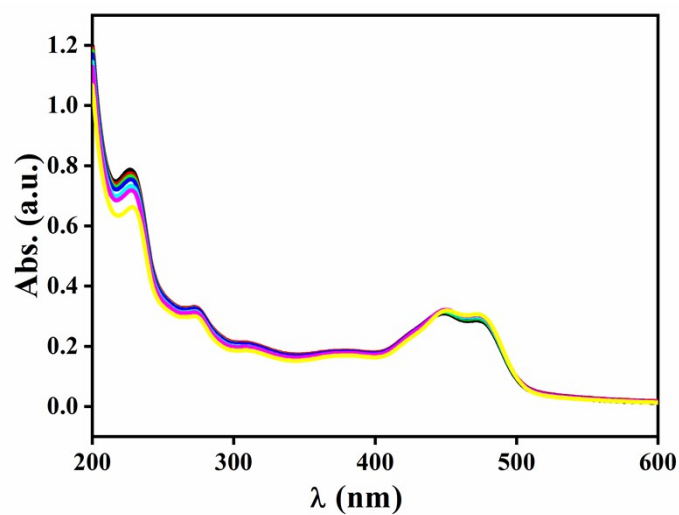

**Figure S14:** (a) UV-Vis absorption spectra of  $\text{K}_2\text{M-Fe}^{3+}$  solution upon addition of different equivalents of NaF in water medium.

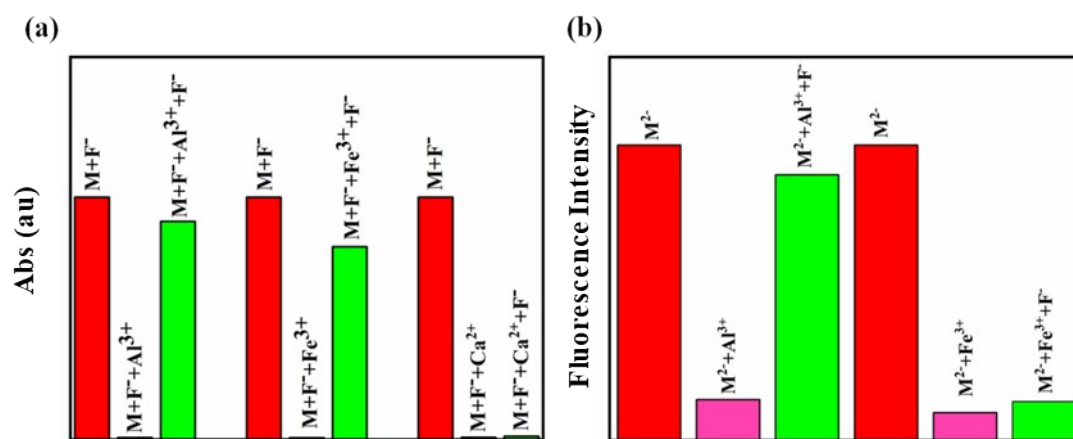

**Figure S15:** Fluoride sensing affinity of different metal complexes generated (a) insitu generated ( $\text{M} + \text{F}^-$ ) in DMSO- $\text{H}_2\text{O}$  medium; (b)  $\text{M}^{2+}$  in  $\text{H}_2\text{O}$  medium.

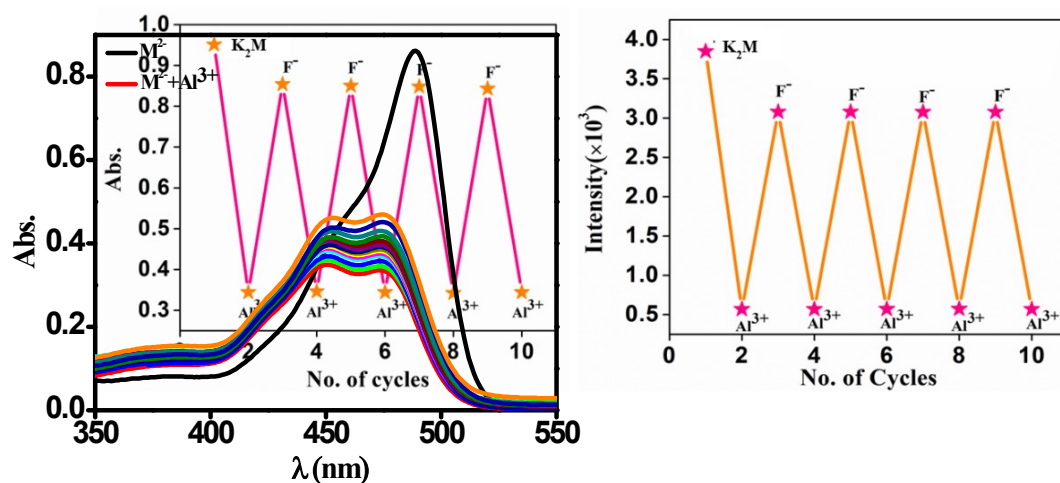

**Figure S16:** Change in the UV-Vis absorption spectra of  $\text{K}_2\text{M}-\text{Al}^{3+}$  solution upon addition of  $\text{F}^-$  (upto 10 ppm) in water medium; (Note: A slight bathochromic shift of the peak is observed above addition of 10 ppm of  $\text{F}^-$ ).

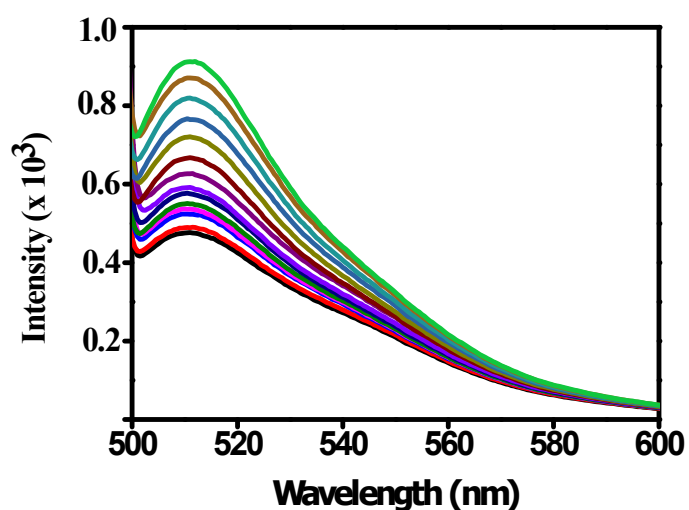

**Figure S17:** (a) Change in the emission spectra of  $\text{K}_2\text{M}-\text{Al}^{3+}$  aqueous solution upon gradual addition of  $\text{F}^-$  (upto 10 ppm) in water medium.

**Figure S18:** Recyclability of the probe studied by (a) absorbance data at 520 nm, and (b)

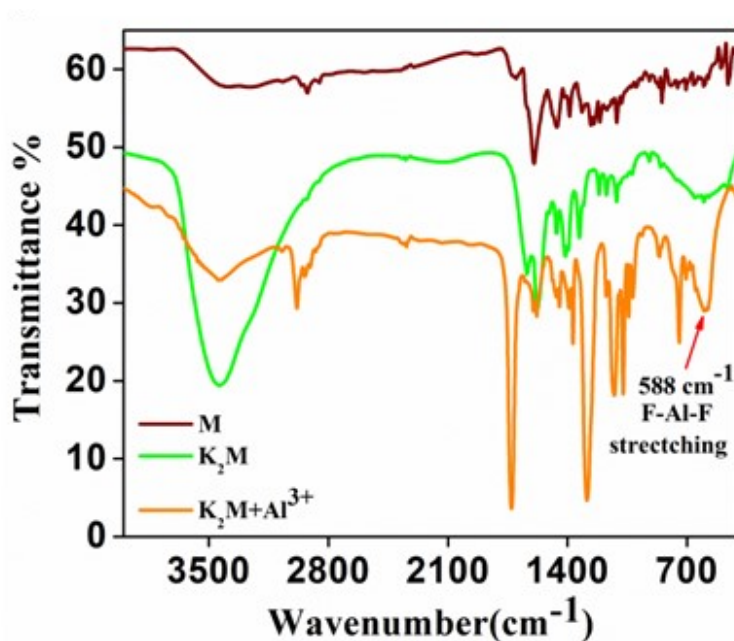

emission data at 540 nm.

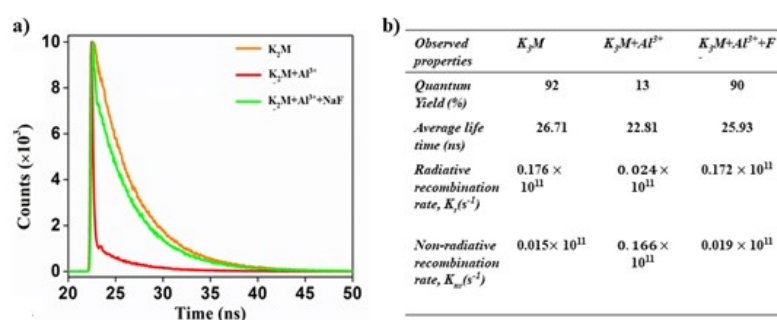

**Figure S19:** (a) Time resolved photoluminescence spectra of K<sub>2</sub>M in presence of Al<sup>3+</sup> and F<sup>-</sup>; (b) characteristic photophysical parameters.

**Figure S20:** FTIR spectra of M, K<sub>2</sub>M and K<sub>2</sub>M in presence of Al<sup>3+</sup> and F<sup>-</sup>.

| Method | Slope of the calibration plot | Intercept of the calibration plot | LOD ( $= \frac{3S_E}{m}$ ) |
|--------|-------------------------------|-----------------------------------|----------------------------|
|        |                               |                                   |                            |

|              |                    |                     |          |
|--------------|--------------------|---------------------|----------|
| UV-Visible   | 0.0119 (SE:0.0058) | 0.013 (SE:0.0026)   | 0.72 ppm |
| Fluorescence | 0.088 (SE: 0.0021) | 0.0176 (SE: 0.0112) | 0.04 ppm |

**Table S2:** Calculation of LOD

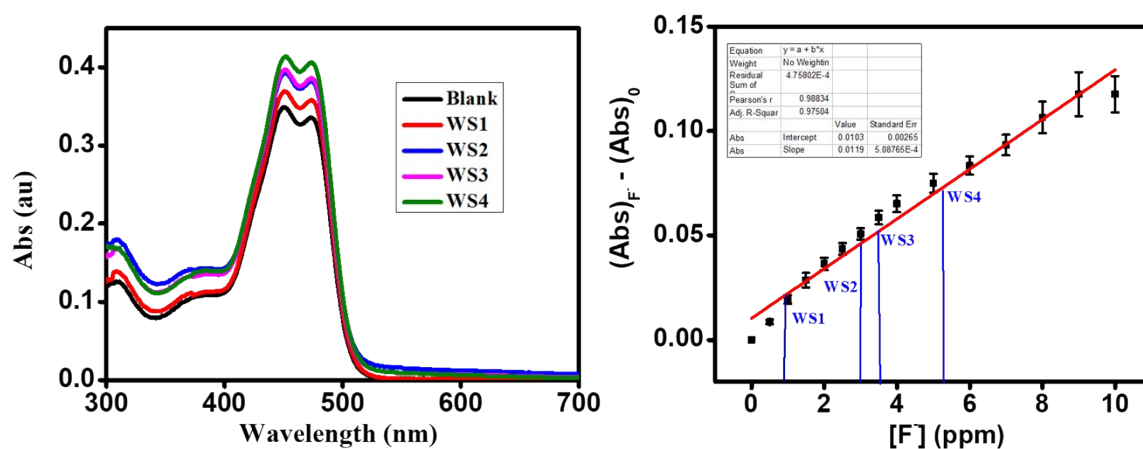

**Figure S21:** (a) UV-Vis spectra of  $K_2M$  (3 mL of 10  $\mu$ M in water) and  $Al^{3+}$  (80  $\mu$ L of 0.01 M in water) mixture upon addition of the 50  $\mu$ L of the fluoridated water samples; (b) the concentration of fluoride samples w.r.t. the calibration plot. The absorbance at 490 nm is correlated for quantification.

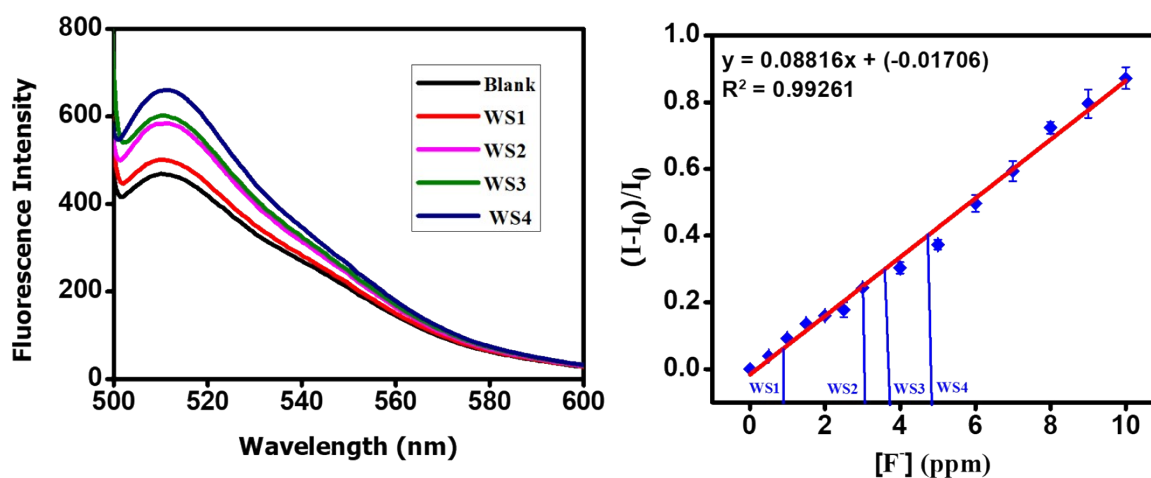



**Figure S22:** (a) Fluorescence spectra of  $K_2M$  (3 mL of 2.5  $\mu M$  in water) and  $Al^{3+}$  (80  $\mu L$  of 0.001 M in water) mixture upon addition of the 50  $\mu L$  of the fluoridated water samples; (b) the concentration of fluoride samples w.r.t. the calibration plot. The emission intensity at 510 nm is correlated for quantification.

| Samples | Concentration of fluoride in ppm in water |                                |                                                                                       |
|---------|-------------------------------------------|--------------------------------|---------------------------------------------------------------------------------------|
|         | UV-Visible spectroscopy                   | Fluorescence spectroscopy      | Fluoride Selective Electrode                                                          |
| WS1     | $1.02 \pm 0.071$ (RSD: 6.96 %)            | $0.90 \pm 0.084$ (RSD: 9.3 %)  |   |
| WS2     | $2.92 \pm 0.314$ (RSD: 10.7 %)            | $3.03 \pm 0.147$ (RSD: 4.85 %) |  |
| WS3     | $3.71 \pm 0.13$ (RSD: 3.5 %)              | $3.50 \pm 0.044$ (RSD: 12.5 %) |  |
| WS4     | $5.07 \pm 0.16$ (RSD: 6.6 %)              | $4.63 \pm 0.158$ (RSD: 3.4 %)  |  |



  
 $K_2M$

  
 $K_2M+Al^{3+}$

  
 $K_2M+Al^{3+}+F^-$

  
 $K_2M+F^-$

**Table S3:** Concentration of fluoride in the water sample as per the different mode of measurement.

**Figure S23:** Validation of the methodology in cellulose paper strip.



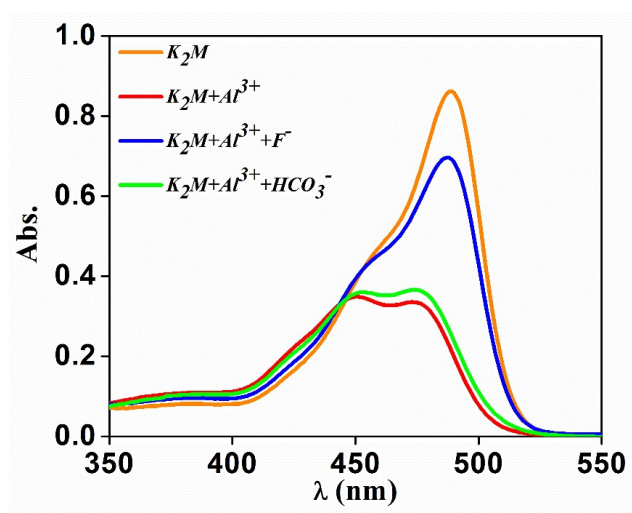

**Figure S24:** Change in the absorbance of the  $K_2M+Al^{3+}$  aqueous solution upon addition of  $F^-$  and  $HCO_3^-$  ion.

**Table S4:** Comparison of the performance of the proposed methods with some of the reported methods

| S. No. | Article title                                                                                                                                                | F- Salt used | Solvent used for study | LO D     | Reference                                                                                                                          |
|--------|--------------------------------------------------------------------------------------------------------------------------------------------------------------|--------------|------------------------|----------|------------------------------------------------------------------------------------------------------------------------------------|
| 1      | Spectroscopic Determination of Fluoride Using Eriochrome BlackT (EBT) as a Spectrophotometric Reagent from Groundwater                                       | NaF          | Water                  | 0.19 ppm | A. G. Mariam, A. Diro, T. G. Asere and D. Jado, F. Melak, <i>International Journal of Analytical Chemistry</i> , 2021(1), 2045491. |
| 2      | Ultrasensitive colorimetric detection of fluoride and arsenate in water and mammalian cells using recyclable metal oxacalixarene probe: a lateral flow assay | NaF          | Water                  | 21 ppb   | S. Dey, A. Kumar, P. K. Mondal, D. Chopra, R. Roy, R., S. Jindani and V. K. Jain. <i>Scientific Reports</i> , 2022, 12(1), 17119.  |
| 3      | Highly Sensitive Optical                                                                                                                                     | NaF          | Water                  | 0.05     | A. Chatterjee, N. Pan, T. K.                                                                                                       |

|    |                                                                                                                           |       |                                  |                         |                                                                                                                                                          |
|----|---------------------------------------------------------------------------------------------------------------------------|-------|----------------------------------|-------------------------|----------------------------------------------------------------------------------------------------------------------------------------------------------|
|    | Sensor for Selective Detection of Fluoride Level in Drinking Water: Methodology to Fabrication of Prototype Device        |       |                                  | ppm                     | Maji, S. S. Pasha, S. Singh, S. A. Ahmed, J. T. Al-Thakafy and S. K. Pal <i>ACS Sustainable Chemistry &amp; Engineering</i> 9, no. 20 (2021): 7160-7170. |
| 4  | A reversible switch as highly selective sequential chemosensor for $\text{Al}^{3+}$ cation followed by $\text{F}^-$ anion | NaF   | Water                            | 1.6 $\mu\text{M}$       | Y. Mi, Z. Cao, Y. Chen, S. Long, Q. Xie, D. Liang and J. Xiang, <i>Sensors and Actuators B: Chemical</i> 2014, 192,164-172.                              |
| 5  | Near-Infrared Fluoride Sensing Nano-Optodes and Distance-Based Hydrogels Containing Aluminum-Phthalocyanine               | TBA F | THF (gel system at different pH) | 0.1 $\mu\text{M}$       | L. Wang, Y. Zhang, L. Wang, Y. Cheng, D. Yuan, J. Zhai, and X. Xie, <i>ACS sensors</i> , <b>2023</b> , 8(11), 4384-4390.                                 |
| 6  | Fluoride ion detection in aqueous medium: Colorimetric and turn-off fluorescent Schiff base chemosensor                   | NaF   | DMSO-Water                       | 2.35 $\times 10^{-8}$ M | B. Devi, A. K. Guha and A. Devi, <i>Spectrochimica Acta Part A: Molecular and Biomolecular Spectroscopy</i> , 2024, 305, 123448.                         |
| 7  | Highly sensitive and selective fluoride detection in water through fluorophore release from a metal-organic framework     | NaF   | Water                            | 15 ppb                  | F. M. Hinterholzinger, B. Rühle, S. Wuttke, K. Karaghiosoff and T. Bein <i>Scientific reports</i> , <b>2013</b> , 3(1), 2562.                            |
| 8  | Highly Sensitive Ratiometric Fluorescent Paper Sensors for the Detection of Fluoride Ions                                 | NaF   | Water                            | 73 nM                   | X. Wu, H. Wang, S. Yang, H. Tian, Y. Liu, Y. and B. Sun, <i>ACS omega</i> , 2019, 4(3), 4918-4926.                                                       |
| 9  | Perylene tetracarboxylate dye-based colorimetric and fluorometric sensor for ppb-level fluoride detection in water        | NaF   | Water                            | 1 ppb                   | S. P. Mahanta, B. C. Mushahary, D. Bora, C. Goswami and R. Das, <i>New Journal of Chemistry</i> , 2025, <b>49</b> , 5444-5450.                           |
| 10 | Selective fluoride ion sensing using novel quinoline chemosensor insights into kinetics and molecular logic gate          | NaF   | Water                            | 5.52 nM                 | A. V. Ashwathi and S. M. Basheer, <i>Scientific Reports</i> , <b>2025</b> , 15(1), 1859.                                                                 |

|    |                                                                                                                   |     |       |          |           |
|----|-------------------------------------------------------------------------------------------------------------------|-----|-------|----------|-----------|
|    | functions                                                                                                         |     |       |          |           |
| 11 | Fluorescein Based Dual Optical Sensor for Highly Selective and Sensitive Fluoride Detection in 100 % Water Medium | NaF | Water | 0.04 ppm | This Work |

## References:

1. D. B. Hibbert and P. Thordarson, The death of the Job plot, transparency, open science and online tools, uncertainty estimation methods and other developments in supramolecular chemistry data analysis. *ChemCommun*, 2016, **52**(87), 12792-12805.
